# Supplementary material for: Green and tunable fabrication of graphene-like N-doped carbon on a 3D metal substrate as a binder-free anode for high-performance potassium-ion batteries
Source: Royal Society of Chemistry journal article supplement (doi:10.1039/c9ta08721d), 2019-01-01
Supplement: c9ta08721d1.pdf [file c9ta08721d1.pdf]

## Supplementary Information

### **Green and Tunable Fabrication of Graphene-Like N-Doped Carbon on 3D Metal Substrate as Binder-Free Anodes for High-Performance Potassium-Ion Batteries**

Yongling An,<sup>a</sup> Yuan Tian,<sup>a</sup> Yuan Li,<sup>a</sup> Shenglin Xiong,<sup>b</sup> Guoqun Zhao,<sup>\*a</sup> Jinkui Feng,<sup>\*a</sup> Yitai Qian<sup>c</sup>

<sup>a</sup> *SDU & Rice Joint Center for Carbon Nanomaterials, Key Laboratory for Liquid-Solid Structural Evolution & Processing of Materials (Ministry of Education), School of Materials Science and Engineering, Shandong University, Jinan 250061, P. R. China.*

<sup>b</sup> *School of Chemistry and Chemical Engineering, Shandong University, Jinan 250100, P. R. China.*

<sup>c</sup> *Hefei National Laboratory for Physical Science at Microscale, Department of Chemistry, University of Science and Technology of China, Hefei 230026, P. R. China.*

\*Corresponding authors

*E-mail addresses:* zhaogq@sdu.edu.cn; jinkui@sdu.edu.cn

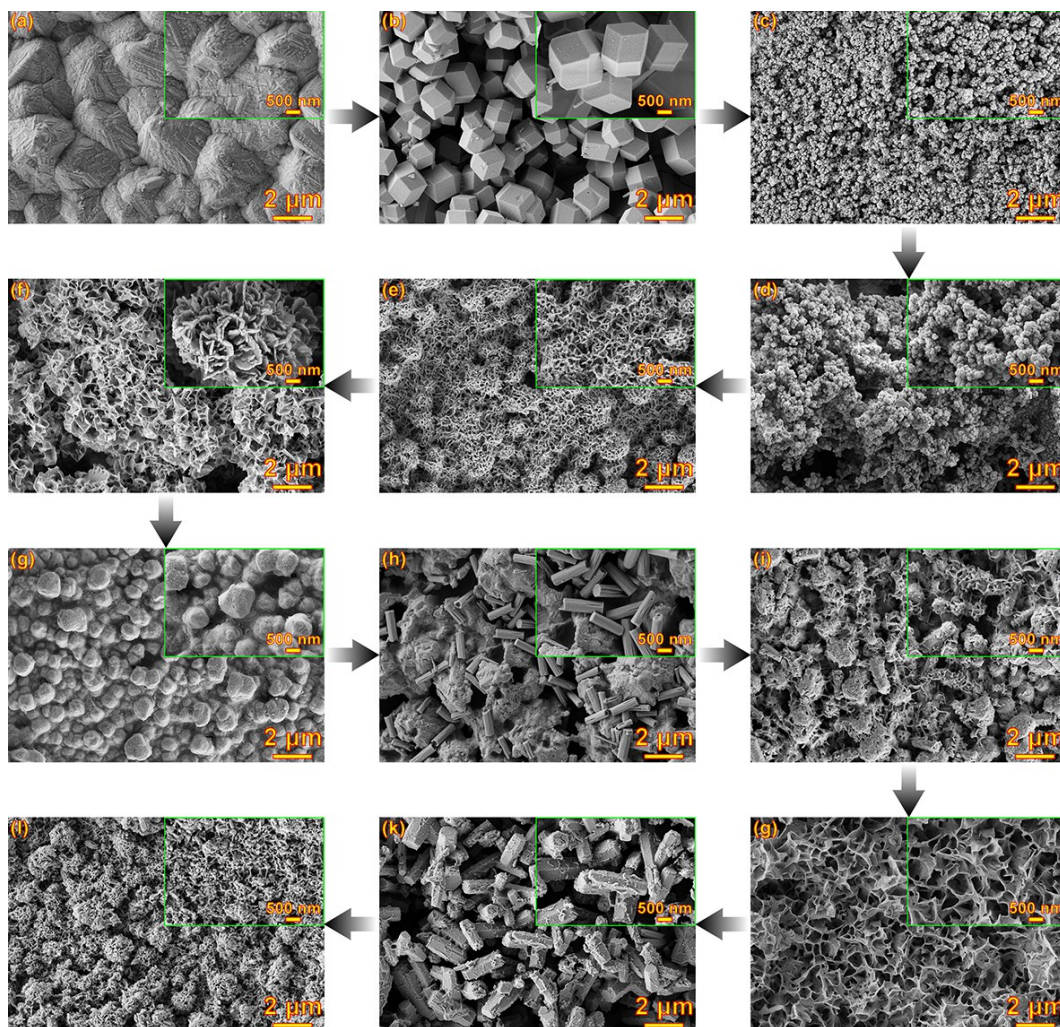

**Fig. S1.** The morphology evolution of ZIF-8/Cu precursor with different volume ratio of DMF and H<sub>2</sub>O. (a) Blank Cu foam, (b) 1:0, (c) 9:1, (d) 4:1, (e) 7:3, (f) 3:2, (g) 1:1, (h) 2:3, (i) 3:7, (j) 1:4, (k) 1:9, (l) 0:1.

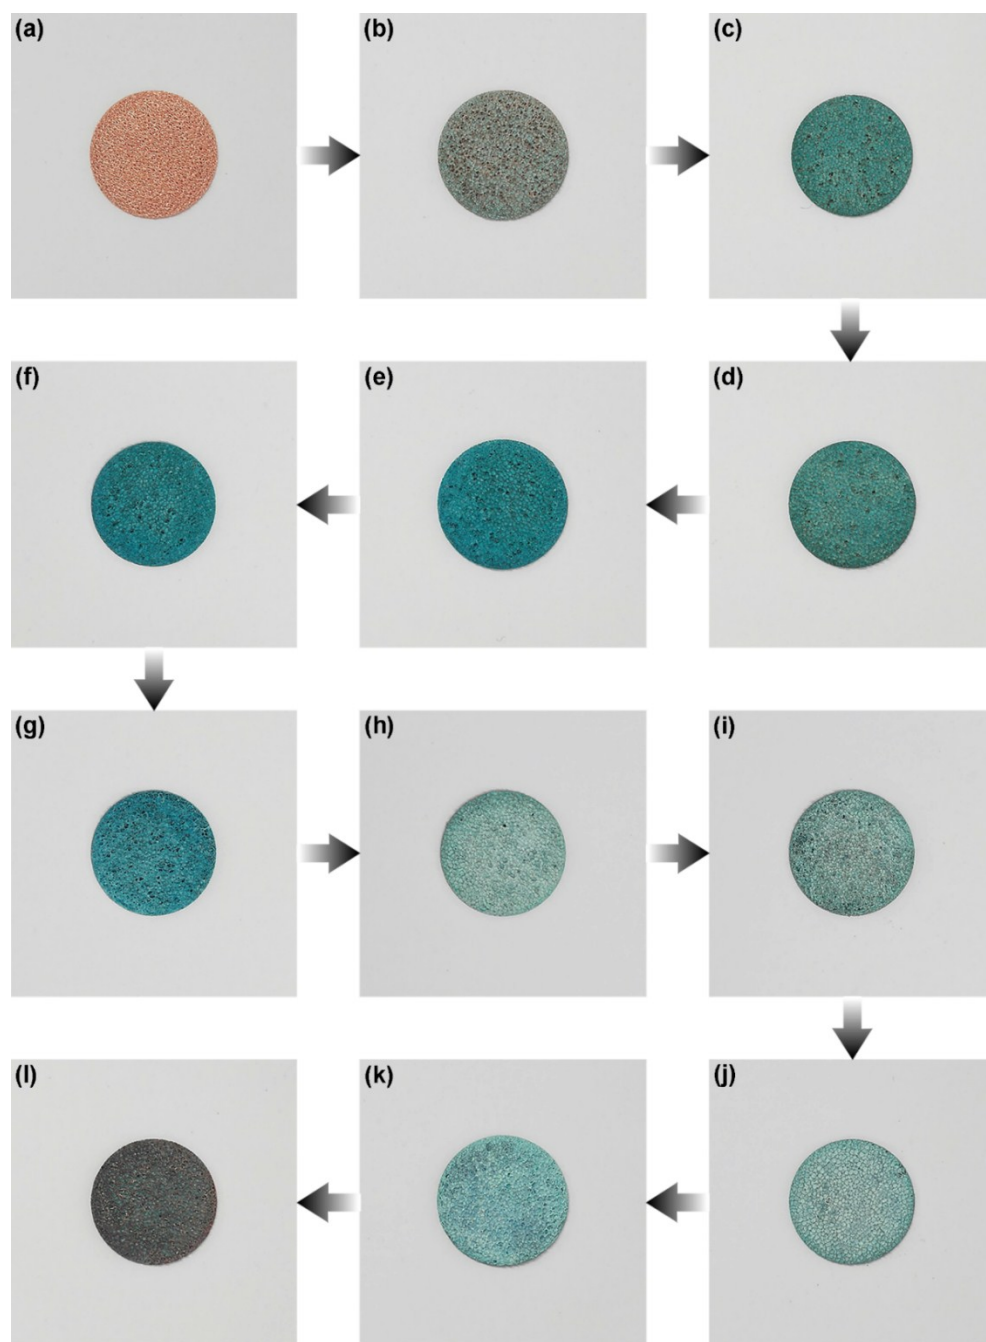

**Fig. S2.** The digital photograph of ZIF-8/Cu precursor with different volume ratio of DMF and H<sub>2</sub>O. (a) Blank Cu foam, (b) 1:0, (c) 9:1, (d) 4:1, (e) 7:3, (f) 3:2, (g) 1:1, (h) 2:3, (i) 3:7, (j) 1:4, (k) 1:9, (l) 0:1.

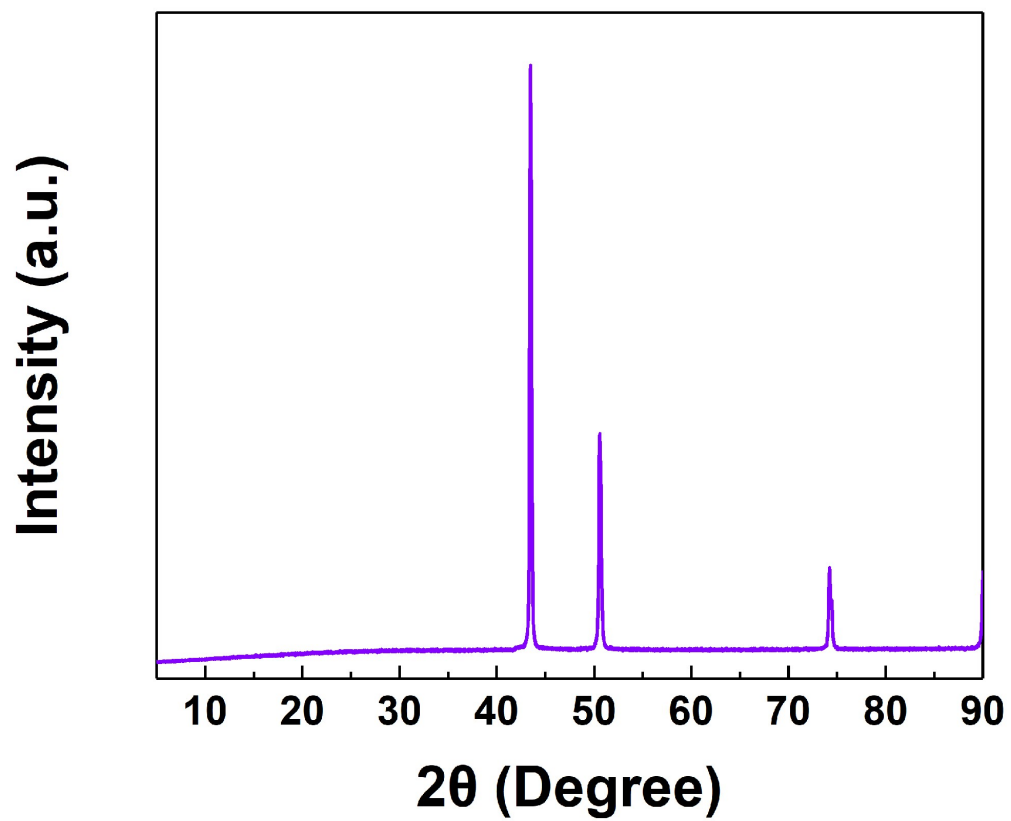

Fig. S3. XRD pattern of Cu foam.

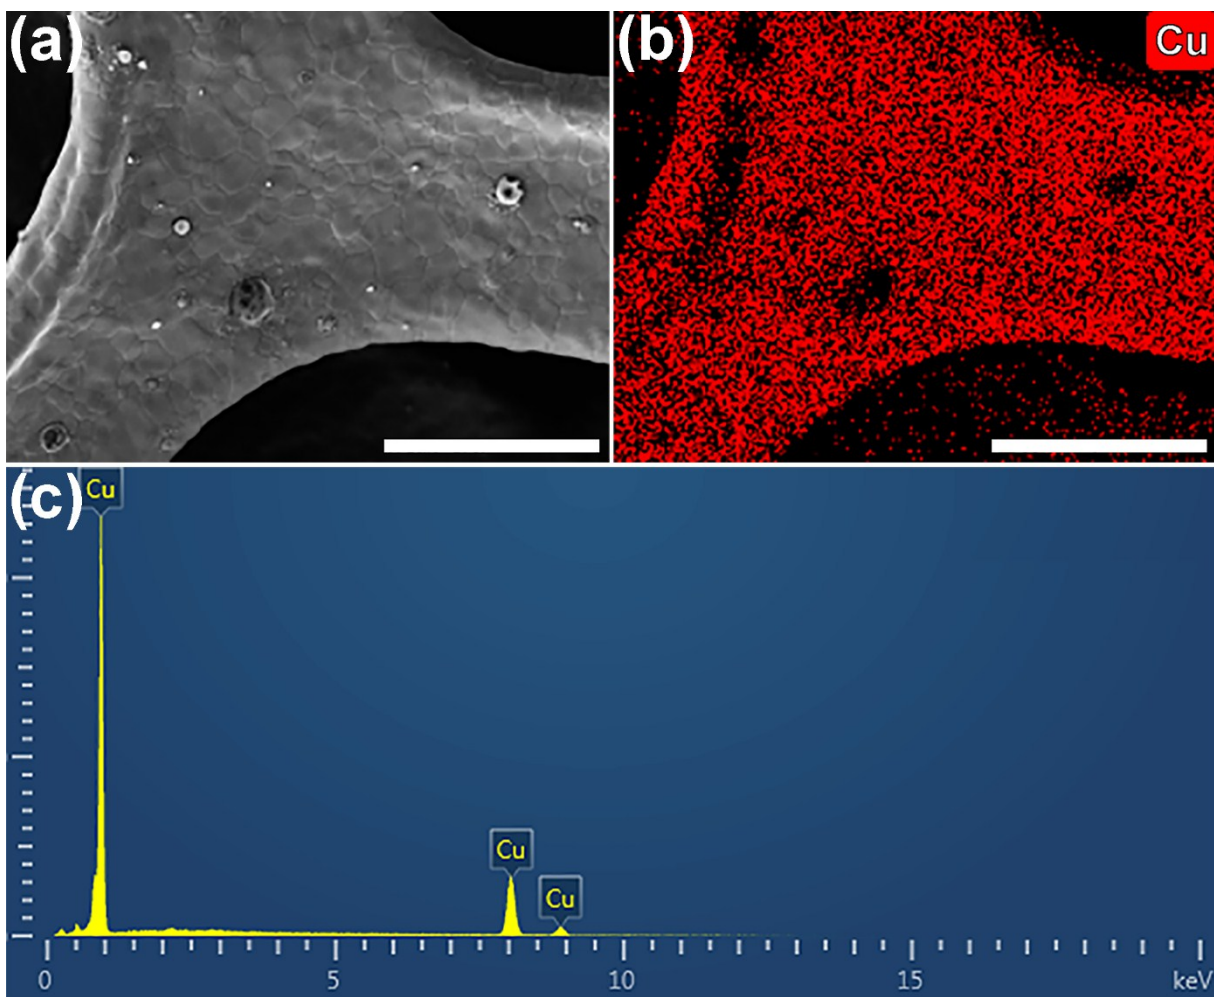

**Fig. S4.** (a) SEM, (b) mapping image, and (c) EDS result of Cu foam. Scale bars: 50  $\mu\text{m}$  (a-b).



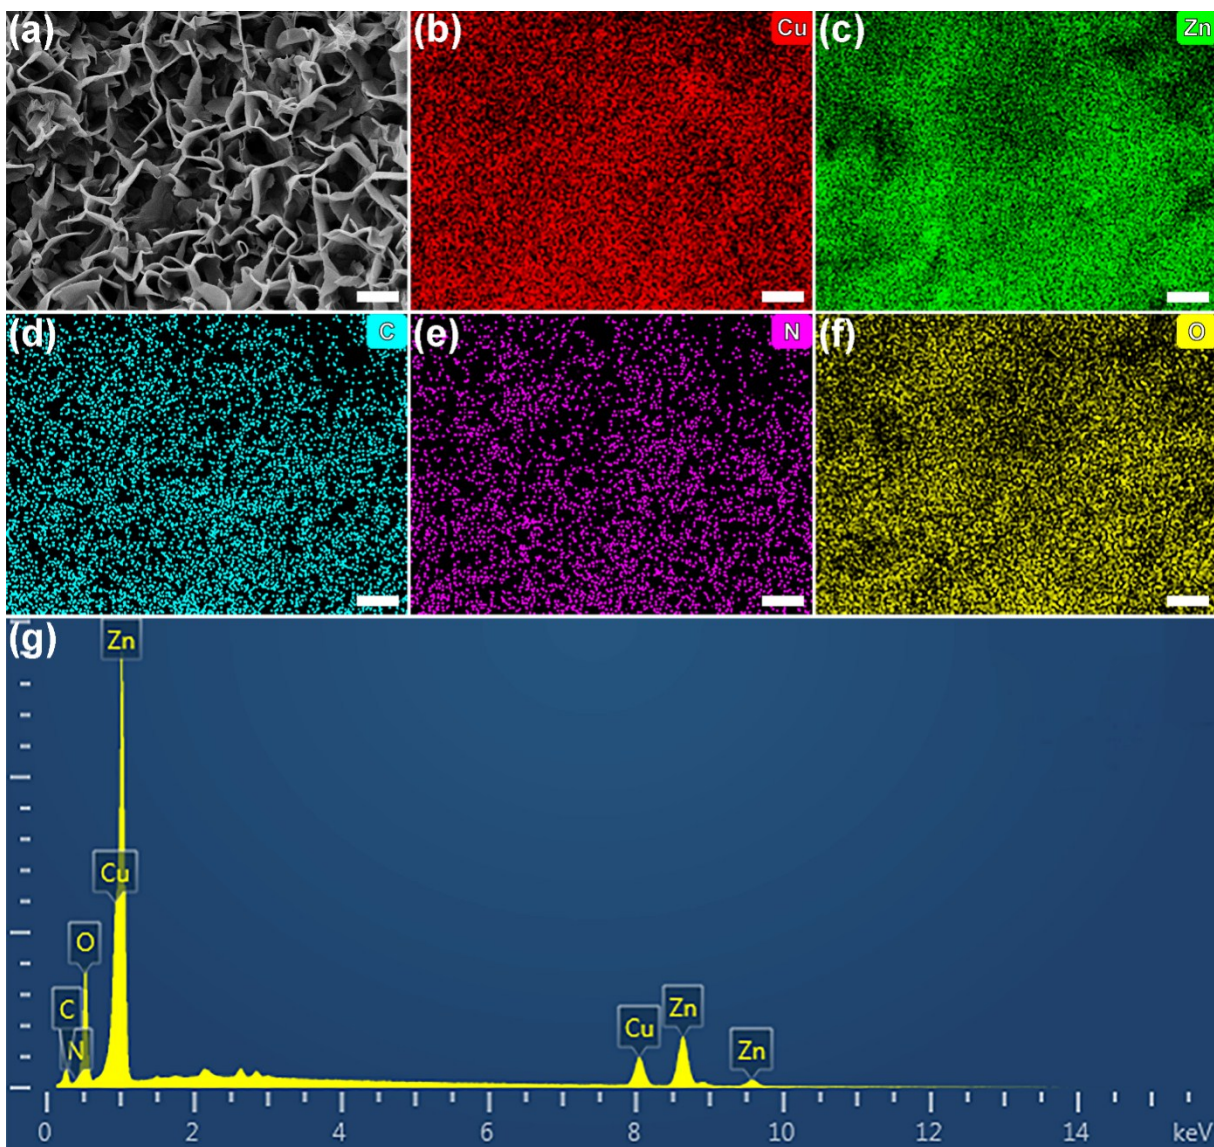

**Fig. S5.** (a) SEM, (b-f) mapping images of (b) Cu, (c) Zn, (d) C, (e) N, (f) O elements, and (g) EDS result of ZIF-8/Cu precursor. Scale bars: 1  $\mu\text{m}$  (a-f).

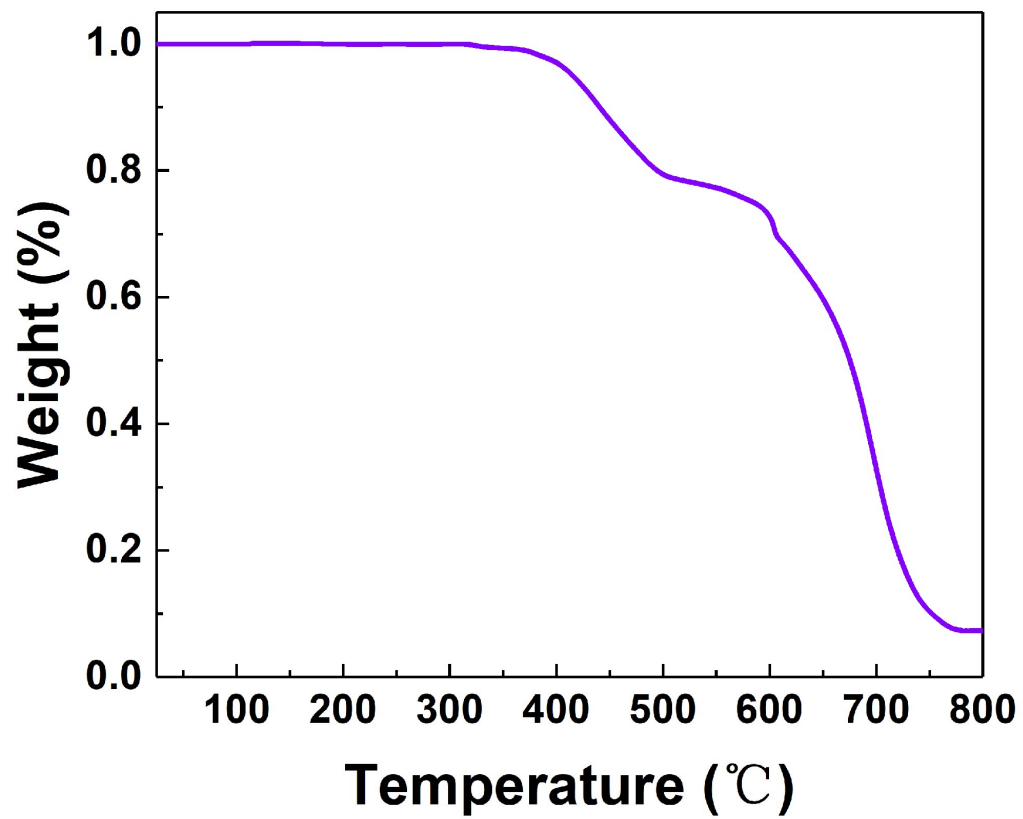

Fig. S6. TGA curve of NPC sample.

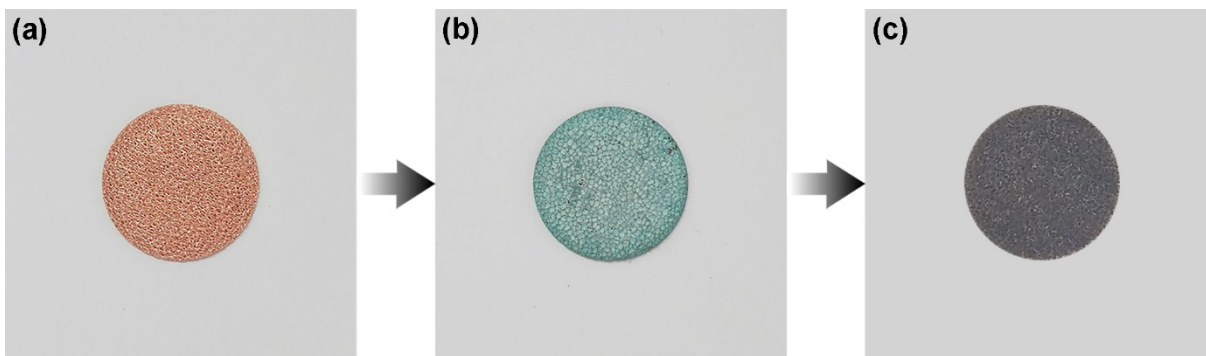

**Fig. S7.** (a-c) The digital photograph of (a) Cu foam, (b) ZIF-8/Cu, and (c) NPC/Cu.



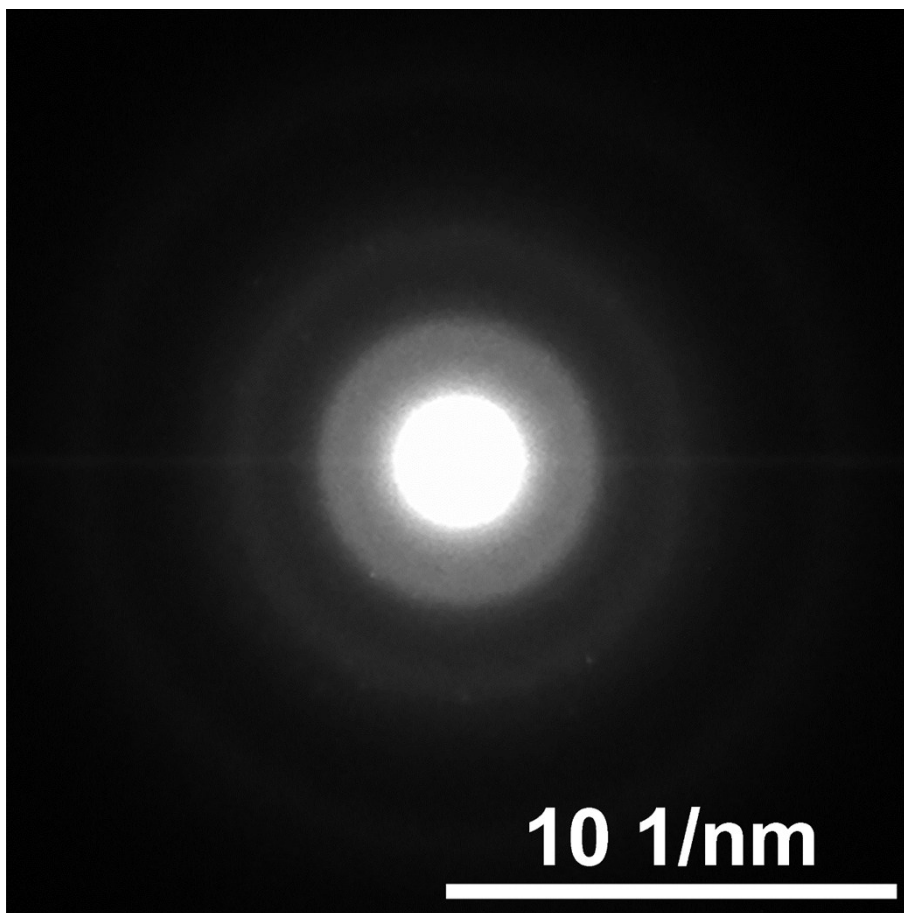

**Fig. S8.** Selected area electron diffraction (SAED) pattern of NPC/Cu.

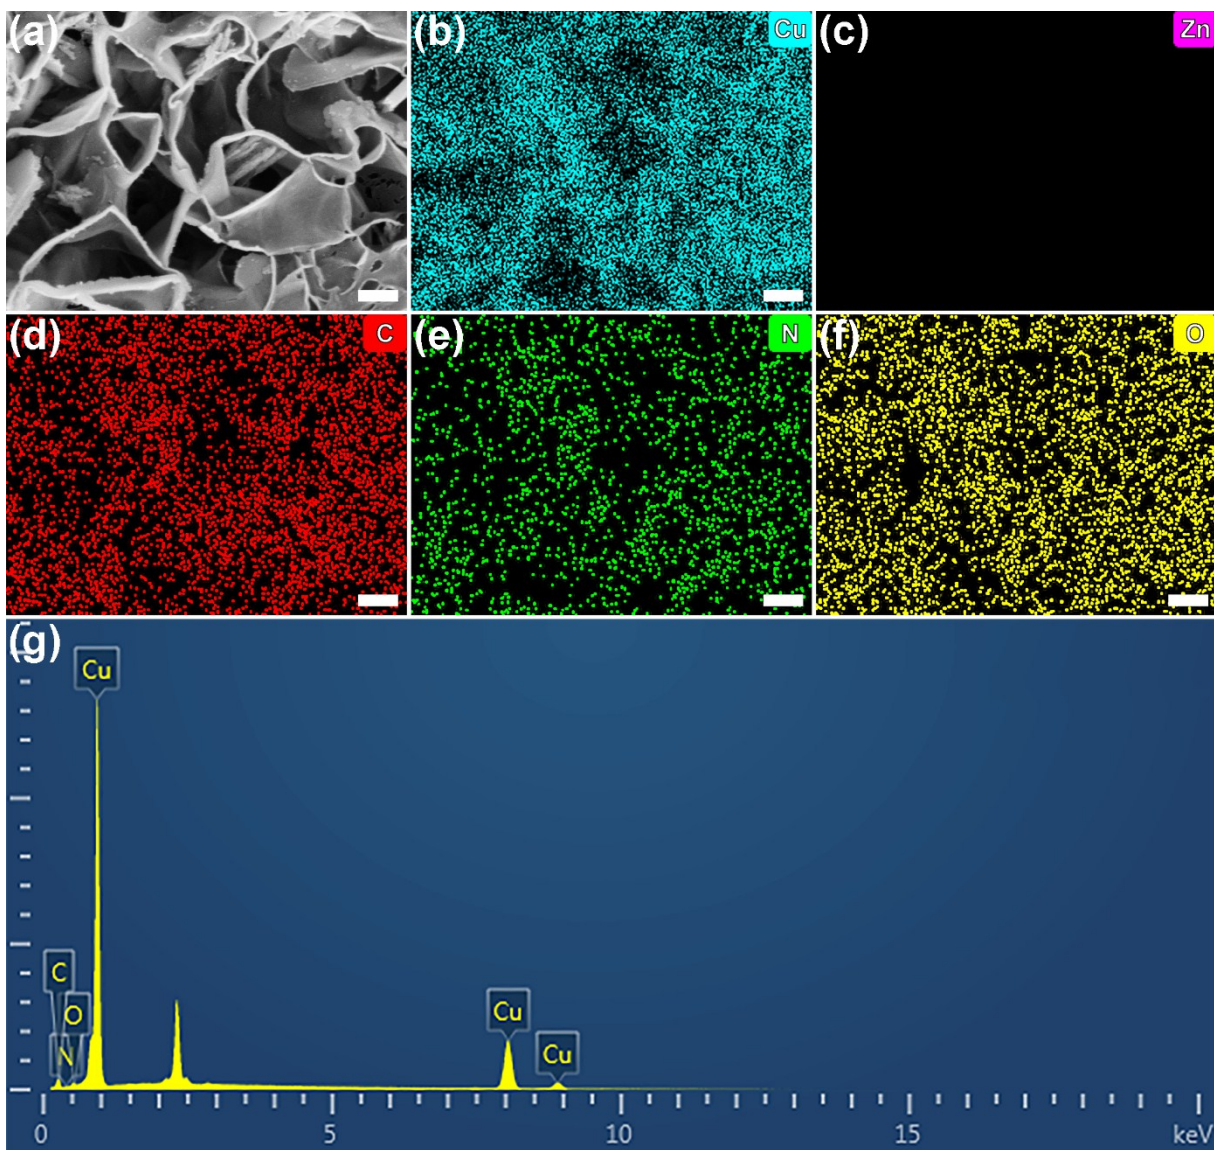

**Fig. S9.** (a) SEM, (b-f) mapping images of (b) Cu, (c) Zn, (d) C, (e) N, (f) O elements, and (g) EDS result of NPC/Cu. Scale bars: 200 nm (a-f).

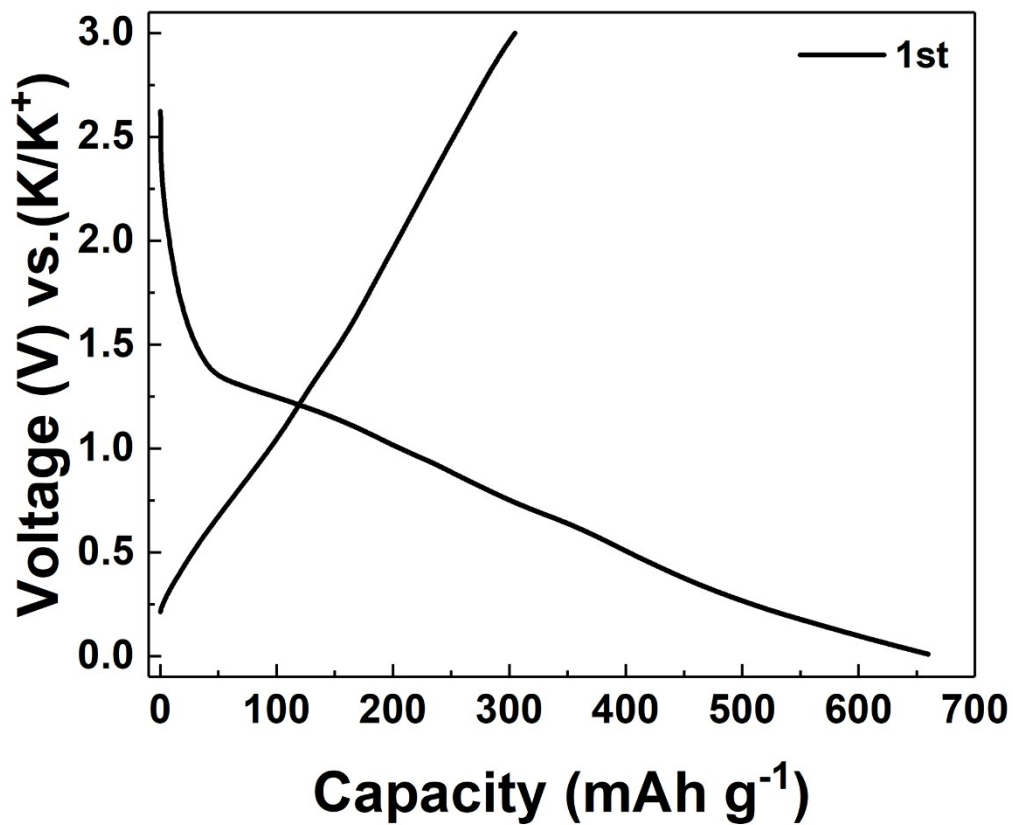

**Fig. S10.** Charge/discharge curves of NPC/Cu anode for KIBs with KFSI-DME-5M electrolyte at a current density of 50 mA g<sup>-1</sup>.

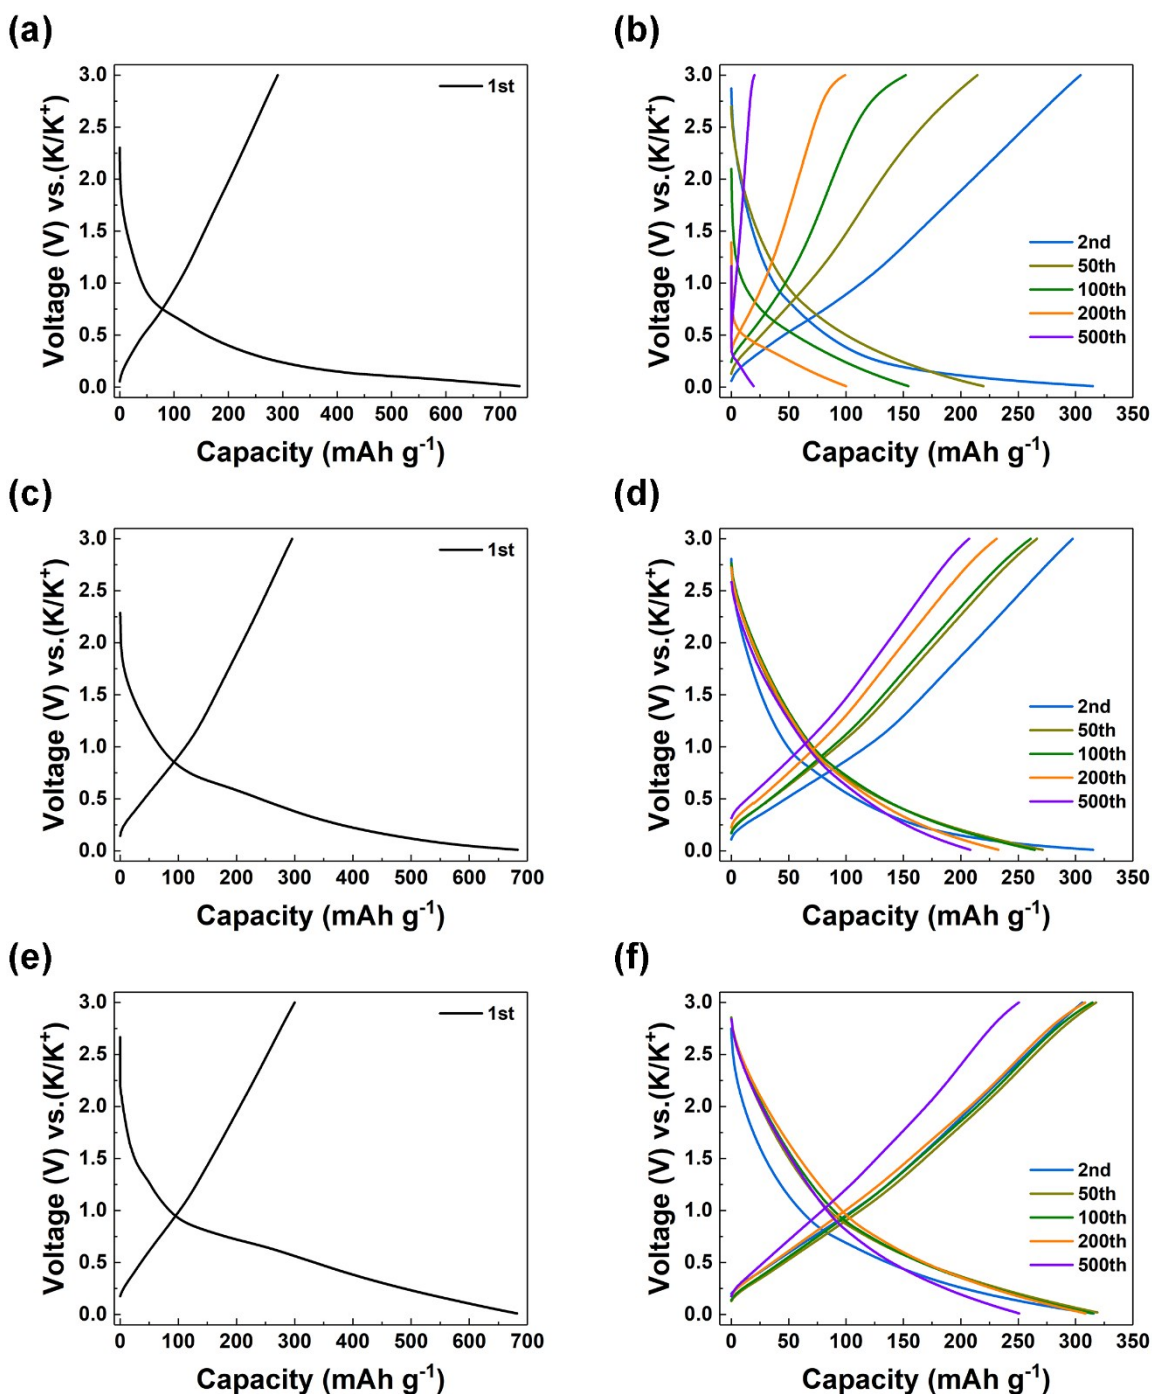

**Fig. S11.** (a-f) Charge/discharge curves of NPC/Cu anode for KIBs with three different electrolytes at a current density of 50 mA g<sup>-1</sup>. (a, b) KFP<sub>6</sub>-DEC/EC electrolyte. (c-d) KFSI-DEC/EC electrolyte. (e-f) KFSI-DME-0.8M electrolyte.

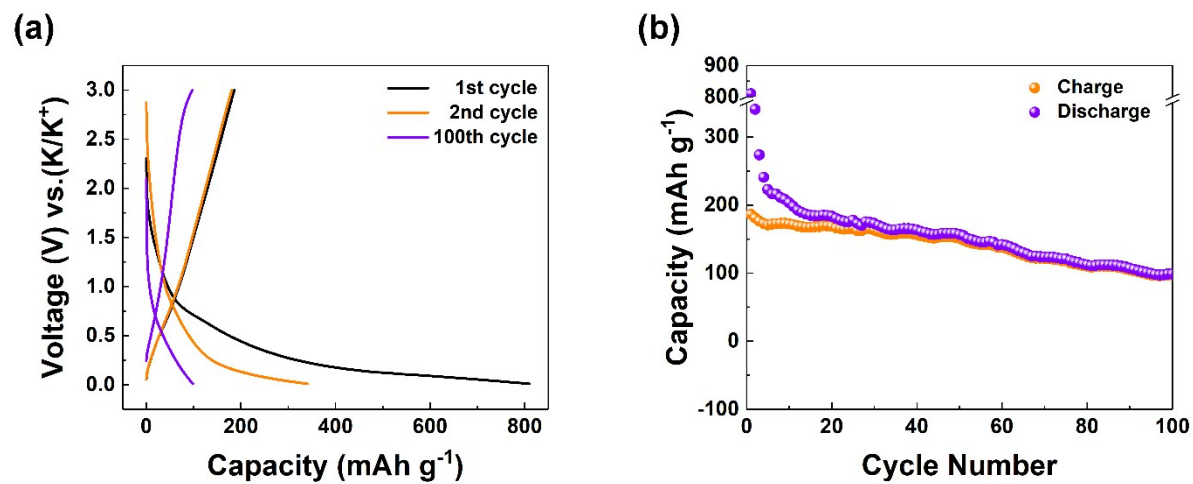

**Fig. S12.** Charge/discharge curves (a) and cyclability (b) of NPC anode for KIBs at 50 mA g<sup>-1</sup>.



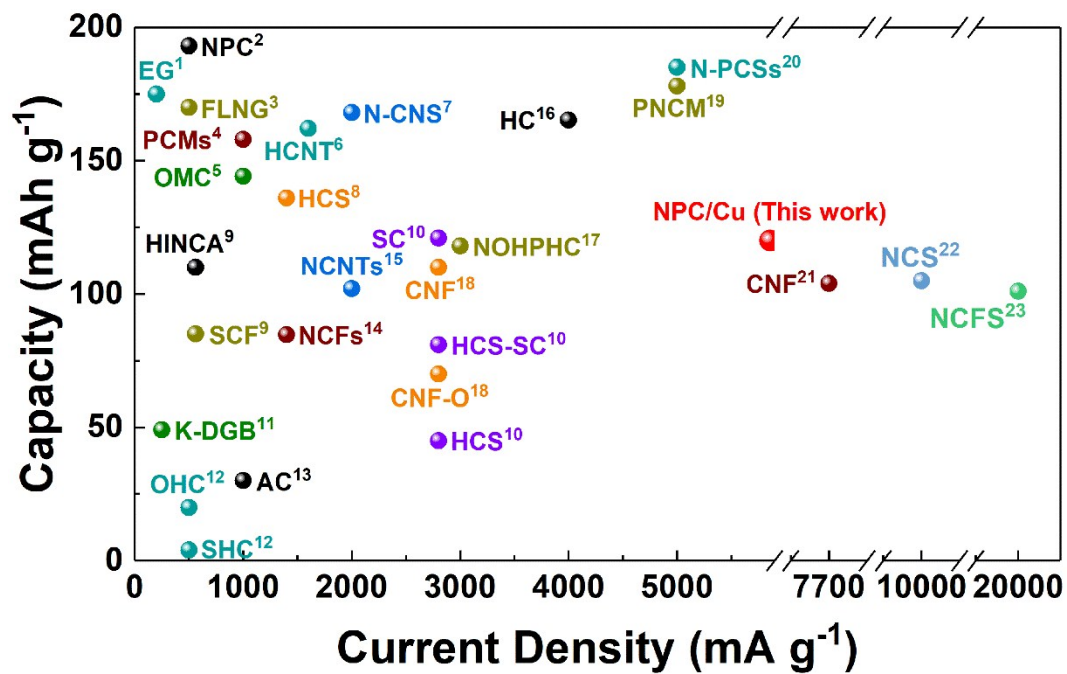

Fig. S13. Rate property of the NPC/Cu anode compared with some reported KIBs anodes.

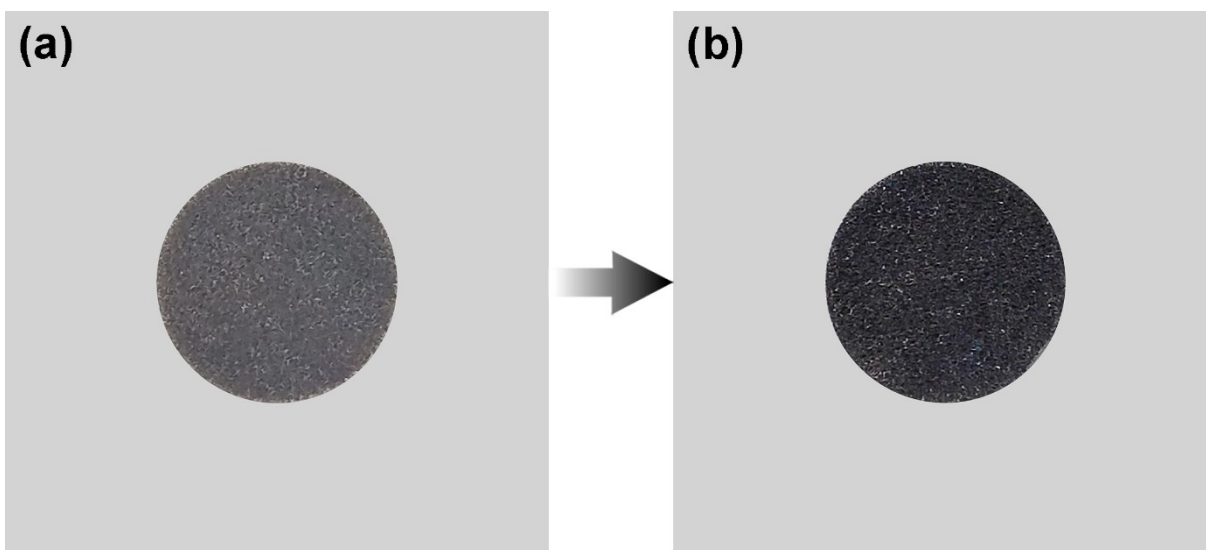

**Fig. S14.** The digital photograph of NPC/Cu anode (a) before and (b) after 500 cycles.

## Reference

1. Y. An, H. Fei, G. Zeng, L. Ci, B. Xi, S. Xiong and J. Feng, *J. Power Sources*, 2018, **378**, 66-72.
2. X. Qi, K. Huang, X. Wu, W. Zhao, H. Wang, Q. Zhuang and Z. Ju, *Carbon*, 2018, **131**, 79-85.
3. Z. Ju, P. Li, G. Ma, Z. Xing, Q. Zhuang and Y. Qian, *Energy Storage Mater.*, 2018, **11**, 38-46.
4. M. Chen, W. Wang, X. Liang, S. Gong, J. Liu, Q. Wang, S. Guo and H. Yang, *Adv. Energy Mater.*, 2018, **8**, 1800171.
5. W. Wang, J. Zhou, Z. Wang, L. Zhao, P. Li, Y. Yang, C. Yang, H. Huang and S. Guo, *Adv. Energy Mater.*, 2018, **8**, 1701648.
6. Y. Wang, Z. Wang, Y. Chen, H. Zhang, M. Yousaf, H. Wu, M. Zou, A. Cao and R. P. S. Han, *Adv. Mater.*, 2018, **30**, 1802074.
7. L. Liu, Y. Chen, Y. Xie, P. Tao, Q. Li and C. Yan, *Adv. Funct. Mater.*, 2018, **28**, 1801989.
8. Z. Jian, Z. Xing, C. Bommier, Z. Li and X. Ji, *Adv. Energy Mater.*, 2016, **6**, 1501874.
9. D. S. Bin, X. J. Lin, Y. G. Sun, Y. S. Xu, K. Zhang, A. M. Cao and L. J. Wan, *J. Am. Chem. Soc.*, 2018, **140**, 7127-7134.
10. Z. Jian, S. Hwang, Z. Li, A. S. Hernandez, X. Wang, Z. Xing, D. Su and X. Ji, *Adv. Funct. Mater.*, 2017, **27**, 1700324.
11. K. Beltrop, S. Beuker, A. Heckmann, M. Winter and T. Placke, *Energy Environ. Sci.*, 2017, **10**, 2090-2094.
12. S. J. R. Prabakar, S. C. Han, C. Park, I. A. Bhairuba, M. J. Reece, K.-S. Sohn and M. Pyo, *J. Electrochem. Soc.*, 2017, **164**, A2012-A2016.

13. Z. Tai, Q. Zhang, Y. Liu, H. Liu and S. Dou, *Carbon*, 2017, **123**, 54-61.
14. R. Hao, H. Lan, C. Kuang, H. Wang and L. Guo, *Carbon*, 2018, **128**, 224-230.
15. P. Xiong, X. Zhao and Y. Xu, *ChemSusChem*, 2018, **11**, 202-208.
16. X. He, J. Liao, Z. Tang, L. Xiao, X. Ding, Q. Hu, Z. Wen and C. Chen, *J. Power Sources*, 2018, **396**, 533-541.
17. J. Yang, Z. Ju, Y. Jiang, Z. Xing, B. Xi, J. Feng and S. Xiong, *Adv. Mater.*, 2018, **30**, 1700104.
18. R. A. Adams, J. M. Syu, Y. Zhao, C. T. Lo, A. Varma and V. G. Pol, *ACS Appl. Mater. Interfaces*, 2017, **9**, 17872-17881.
19. Y. Xie, Y. Chen, L. Liu, P. Tao, M. Fan, N. Xu, X. Shen and C. Yan, *Adv. Mater.*, 2017, **29**, 1702268.
20. P. Li, J.-Y. Hwang, S.-M. Park and Y.-K. Sun, *J. Mater. Chem. A*, 2018, **6**, 12551-12558.
21. X. Zhao, P. Xiong, J. Meng, Y. Liang, J. Wang and Y. Xu, *J. Mater. Chem. A*, 2017, **5**, 19237-19244.
22. C. Chen, Z. Wang, B. Zhang, L. Miao, J. Cai, L. Peng, Y. Huang, J. Jiang, Y. Huang, L. Zhang and J. Xie, *Energy Storage Mater.*, 2017, **8**, 161-168.
23. Y. Xu, C. Zhang, M. Zhou, Q. Fu, C. Zhao, M. Wu and Y. Lei, *Nat. Commun.*, 2018, **9**, 1720.
